# Supplementary material for: Association between inflammatory bowel disease and cancer risk: evidence triangulation from genetic correlation, Mendelian randomization, and colocalization analyses across East Asian and European populations
Source: PubMed Central journal article supplement (PMC10964701; doi:10.1186/s12916-024-03352-9), 2024-03-25

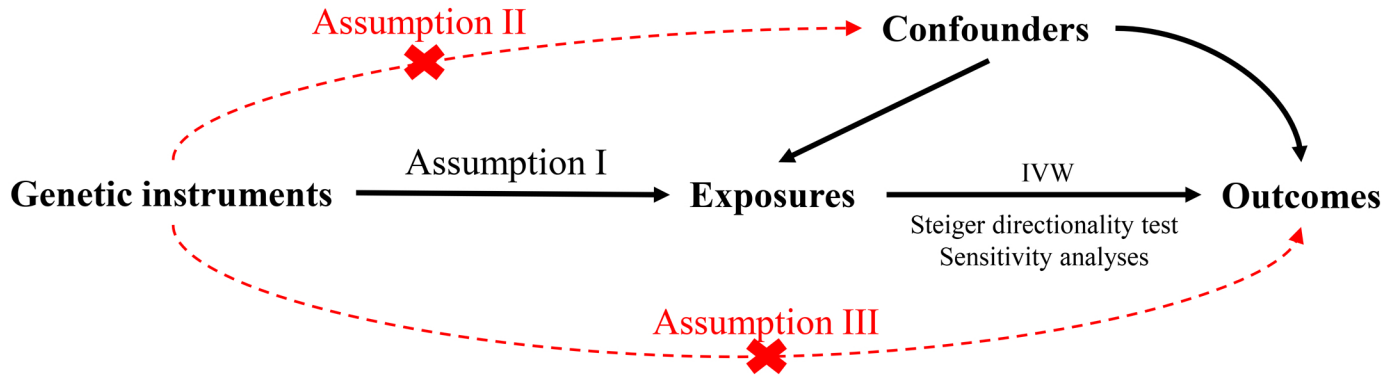

Supplement: 12916_2024_3352_MOESM2_ESM.pdf [file 12916_2024_3352_MOESM2_ESM.pdf]
